# Supplementary material for: Syntheses, characterization and redox properties of oxo-centred triruthenium cluster dimers and trimers linked by ortho-metallated polypyridyl ligands
Source: Royal Society of Chemistry journal article supplement (doi:10.1039/b717315f), 2008-01-01
Supplement: b717315f.pdf [file b717315f.pdf]

# **Electronic Supplementary Information**

## **Syntheses, characterization and redox properties of oxo-centered triruthenium cluster dimers and trimers linked by ortho-metallated polypyridyl ligands**

Feng-Rong Dai, Heng-Yun Ye, Jing-Lin Chen, Li-Yi Zhang, and Zhong-Ning Chen\*

*State Key Laboratory of Structural Chemistry, Fujian Institute of Research on the Structure of Matter, the Chinese Academy of Sciences, Fuzhou, Fujian 350002, China*

E-mail: [czn@fjirsm.ac.cn](mailto:czn@fjirsm.ac.cn)

**Table S1.** <sup>1</sup>H NMR Chemical Shifts (δ) for Compounds **6**, **7**, **7a**, **9**, **11**, and **11a**.<sup>a</sup>

|              | <b>6</b>      | <b>7</b>       | <b>7a</b>      | <b>9</b>       | <b>11</b>      | <b>11a</b>  |
|--------------|---------------|----------------|----------------|----------------|----------------|-------------|
| δ (acetate)  | 5.526 (6H)    | 5.543 (12H)    | 2.200 (24H)    | 10.688 (3H)    | 5.824 (12H)    | 2.122 (12H) |
|              | 5.066 (12H)   | 4.906 (24H)    | 2.125 (12H)    | 7.026 (3H)     | 4.954 (24H)    | 2.046 (24H) |
|              |               |                |                | 4.514 (3H)     |                |             |
|              |               |                |                | 2.837 (3H)     |                |             |
|              |               |                |                | 0.855 (3H)     |                |             |
| δ (N ligand) | 8.877 (1H, g) | 6.164 (2H, c)  | 10.084 (2H, a) | 9.988 (1H, d)  | 8.573 (2H, d)  | 9.304 (2H)  |
|              | 8.621 (1H, f) | 1.288 (2H, b)  | 9.105 (2H, b)  | 5.872 (1H, f)  | 6.782 (2H, c)  | 8.781 (2H)  |
|              | 8.549 (1H, d) | 1.211 (2H, a)  | 8.821 (2H, c)  | 2.552 (1H, c)  | 2.863 (2H, b)  | 8.032 (2H)  |
|              | 6.251 (1H, h) |                |                | 1.288(1H, g)   | 1.291 (2H, a)  | 7.792 (2H)  |
|              | 2.420 (1H, c) |                |                | -7.384 (1H, a) |                |             |
|              | 0.897 (1H, a) |                |                |                |                |             |
| δ (py')      |               |                |                | 9.497 (1H, α') |                |             |
|              |               |                |                | 8.788 (2H, β') |                |             |
|              |               |                |                | 7.431 (2H, γ') |                |             |
| δ (py)       | 6.586 (2H, γ) | 6.522 (4H, γ)  | 9.105 (8H, α)  | 6.405 (1H, γ)  | 6.308 (4H, α)  | 8.986 (8H)  |
|              | 5.561 (4H, β) | 5.468 (8H, β)  | 8.018 (4H, γ)  | 4.578 (2H, β)  | 5.304 (8H, β)  | 7.791 (4H)  |
|              | 0.008 (4H, α) | -0.161 (8H, α) | 7.755 (8H, β)  | 0.381 (2H, α)  | -0.648 (8H, γ) | 7.702 (8H)  |

<sup>a</sup> <sup>1</sup>H NMR spectra (499.8 MHz) were recorded in CD<sub>3</sub>CN at 298 K except for **7a** and **11a** in CD<sub>2</sub>Cl<sub>2</sub>.

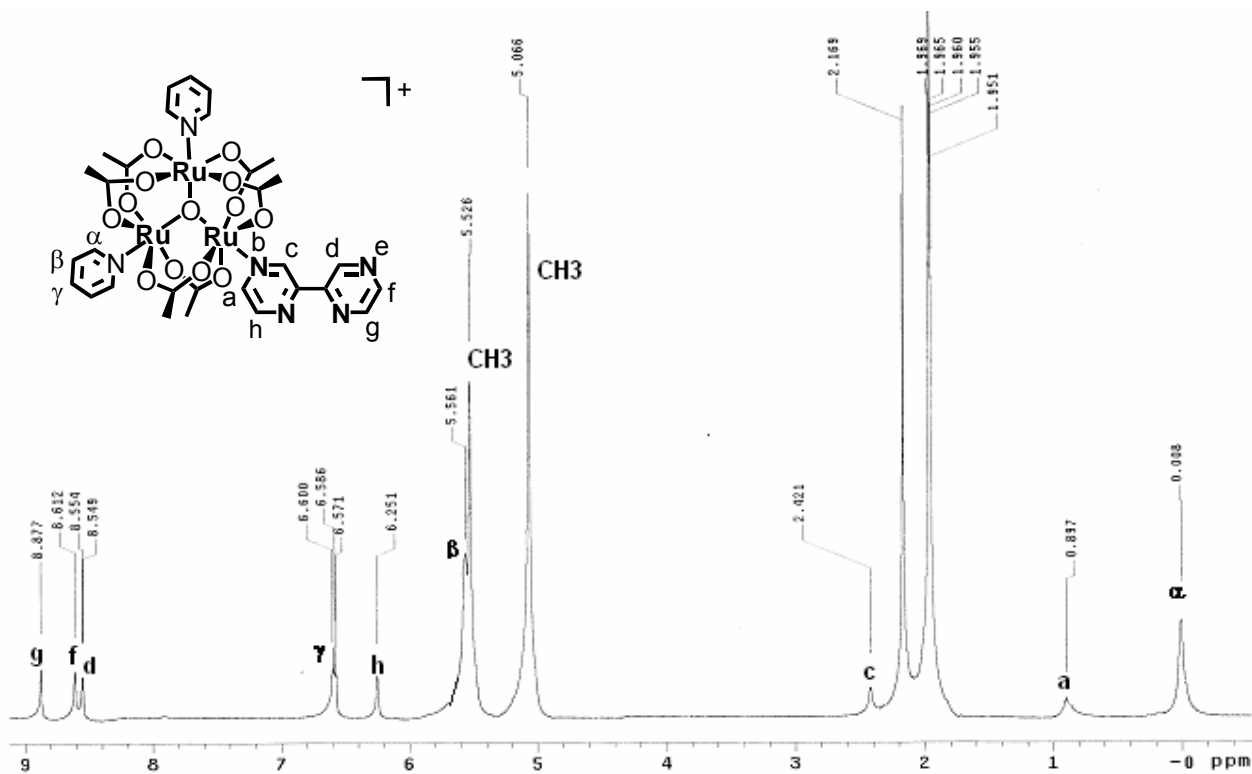

Fig. S1.  $^1\text{H}$  NMR (499.8 MHz) spectrum of compound 6 in  $\text{CD}_3\text{CN}$ .

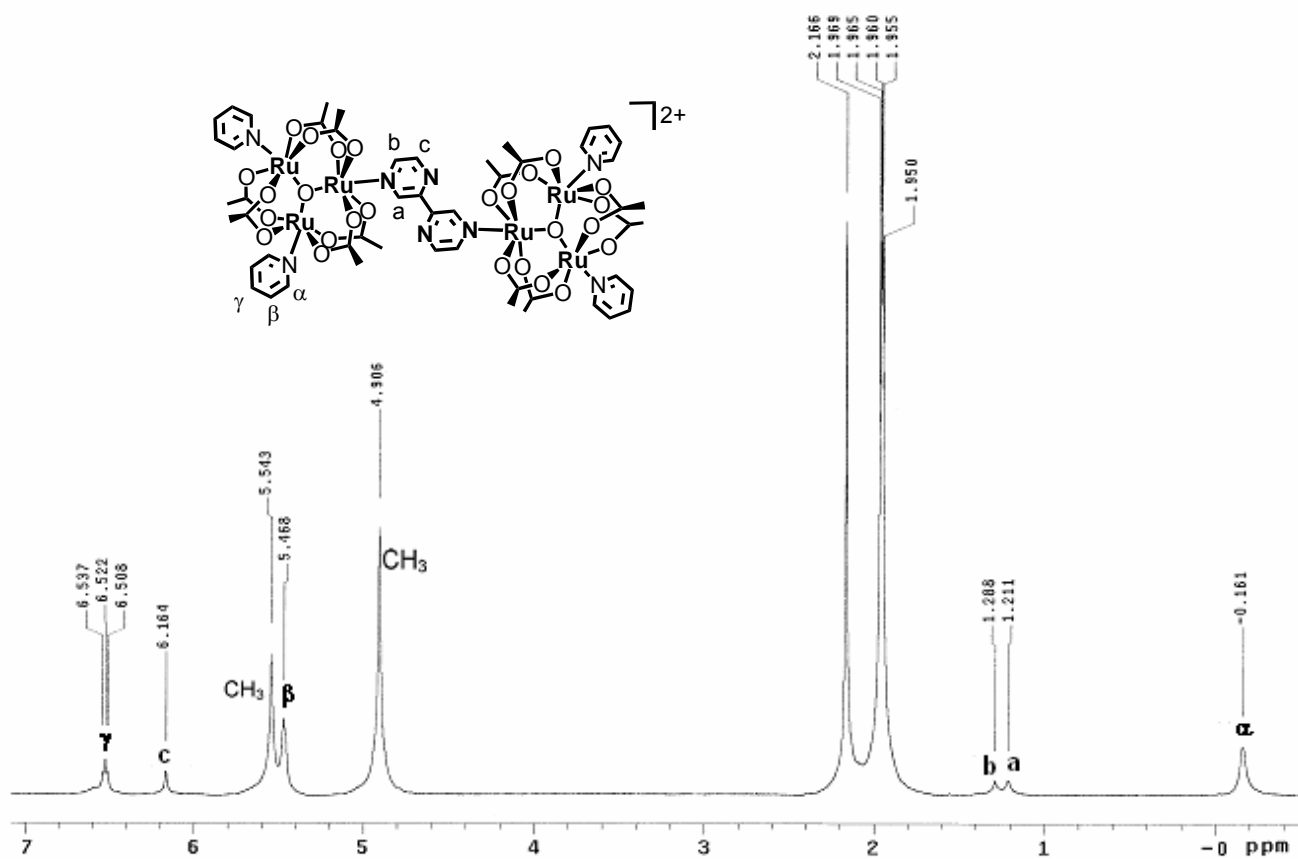

Fig. S2.  $^1\text{H}$  NMR (499.8 MHz) spectrum of compound 7 in  $\text{CD}_3\text{CN}$ .

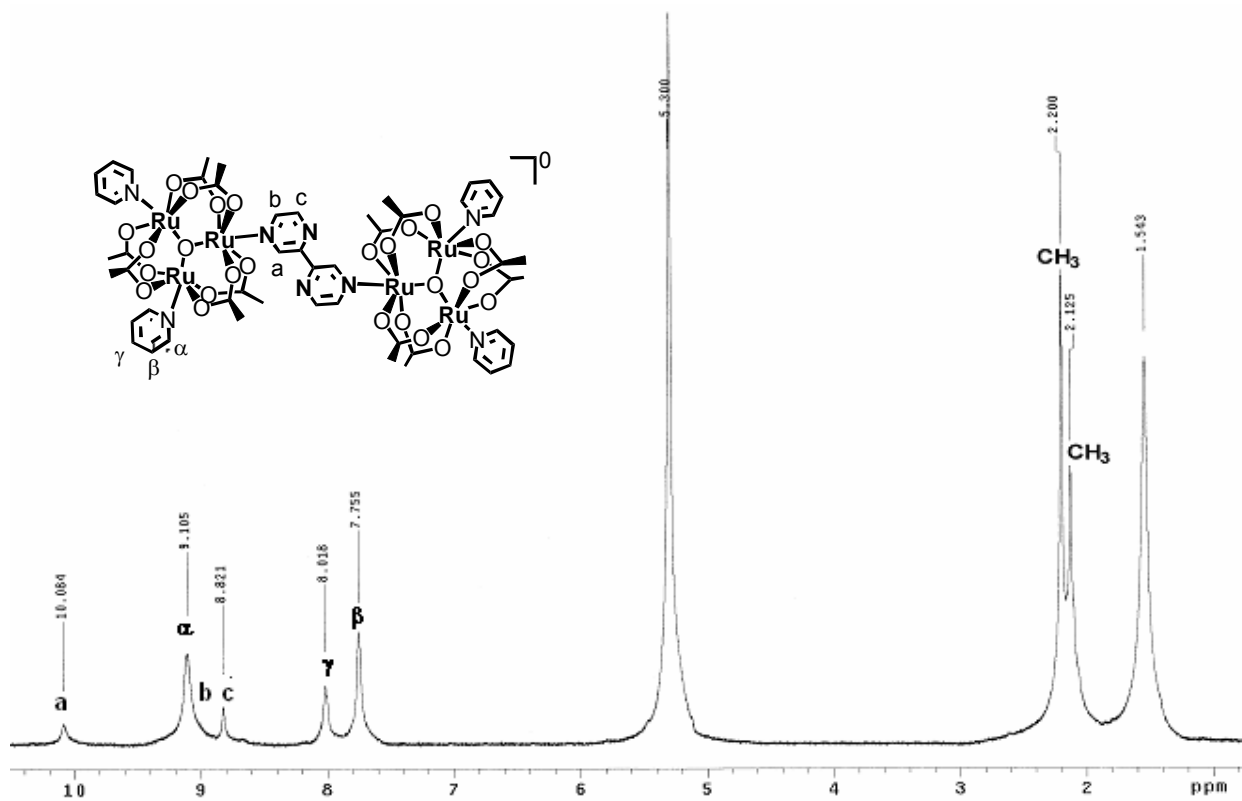

**Fig. S3.** <sup>1</sup>H NMR (499.8 MHz) spectrum of compound **7a** in CD<sub>2</sub>Cl<sub>2</sub>.

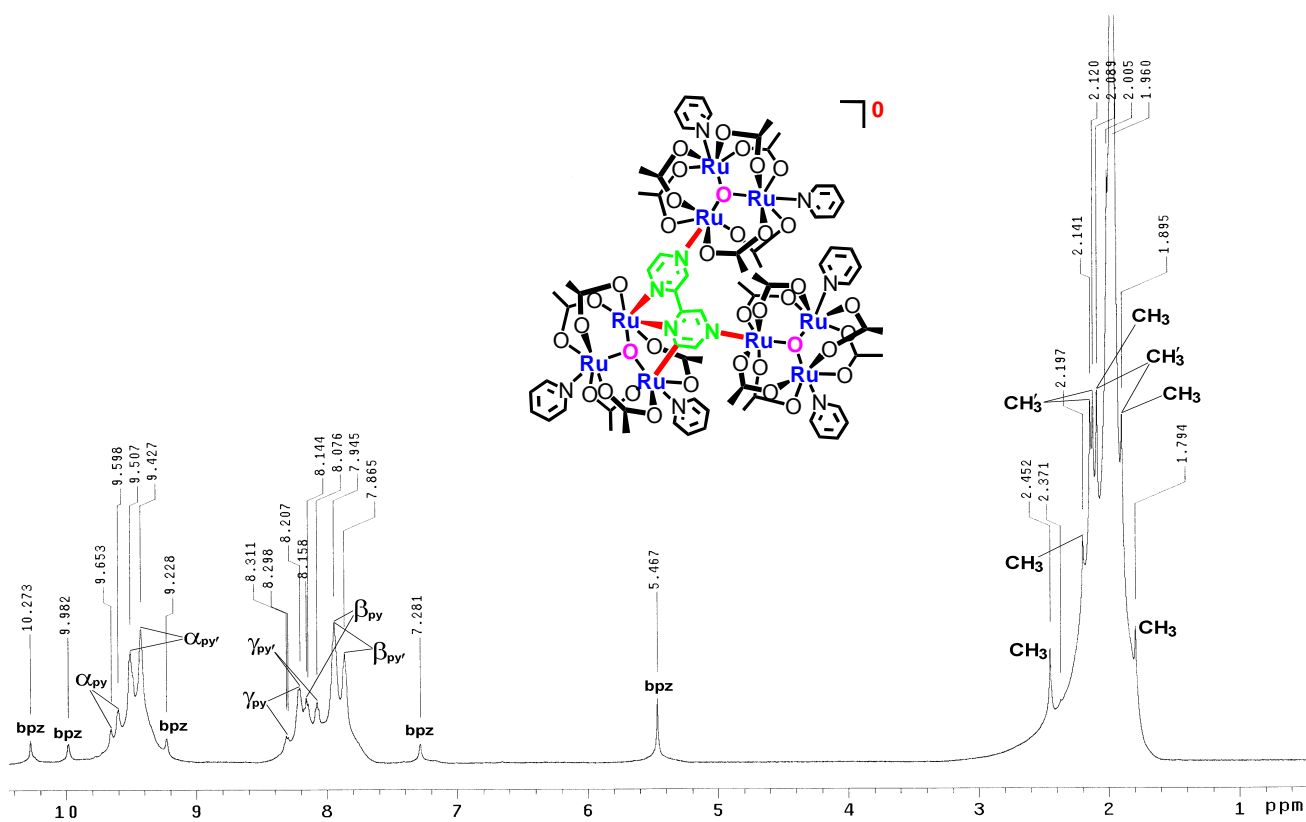

**Fig. S4.** <sup>1</sup>H NMR (499.8 MHz) spectrum of compound **8a** in CD<sub>3</sub>CN.

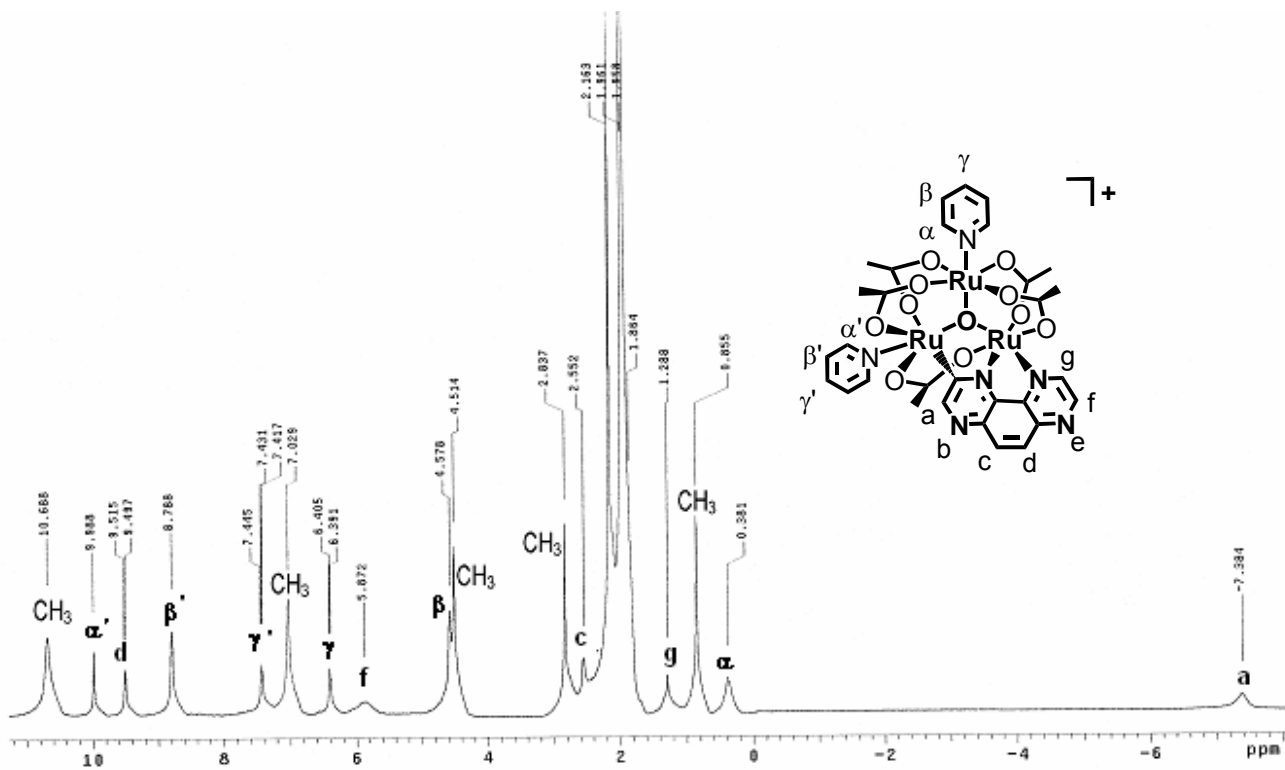

Fig. S5.  $^1\text{H}$  NMR (499.8 MHz) spectrum of compound **9** in  $\text{CD}_3\text{CN}$ .

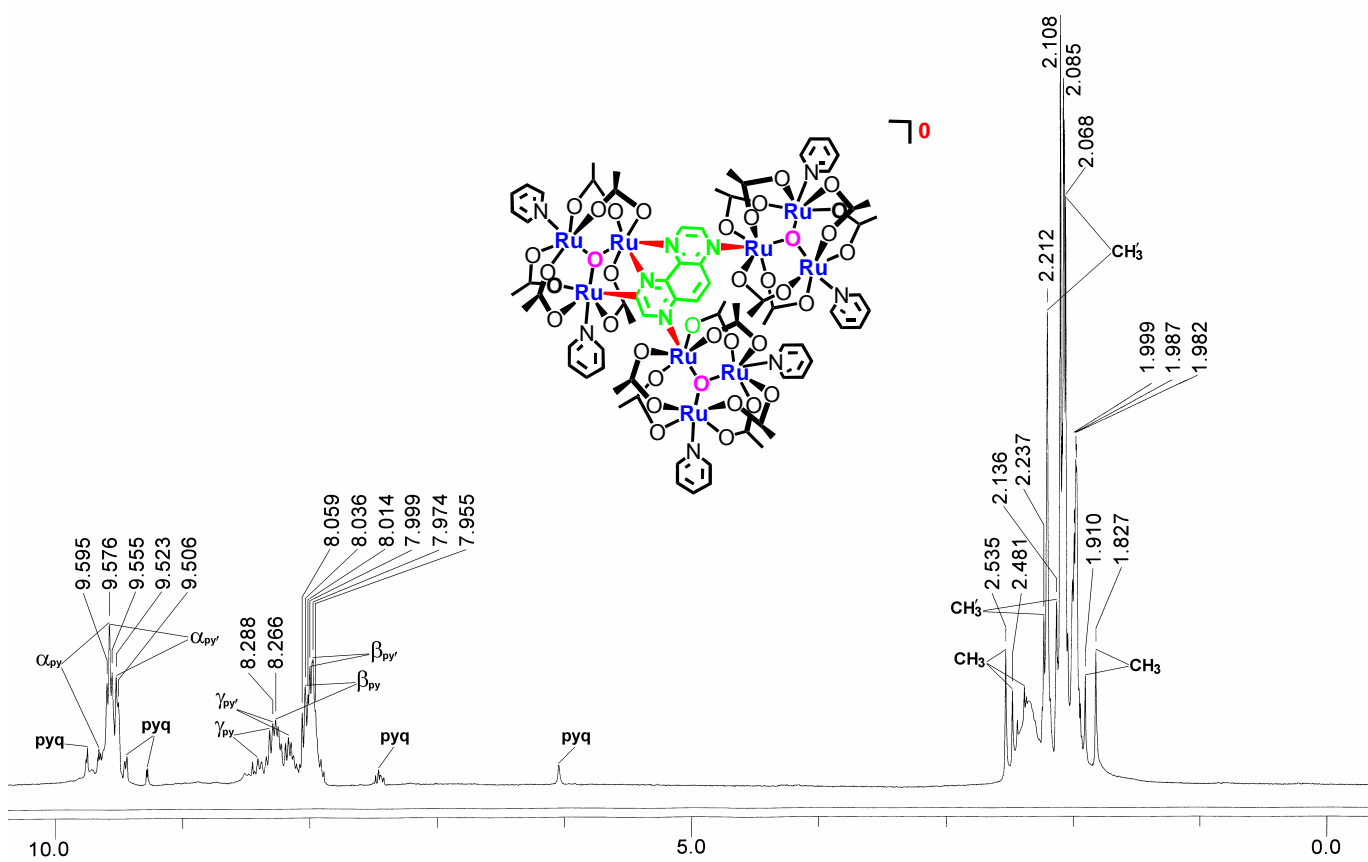

Fig. S6.  $^1\text{H}$  NMR (499.8 MHz) spectrum of compound **10a** in  $\text{CD}_3\text{CN}$ .

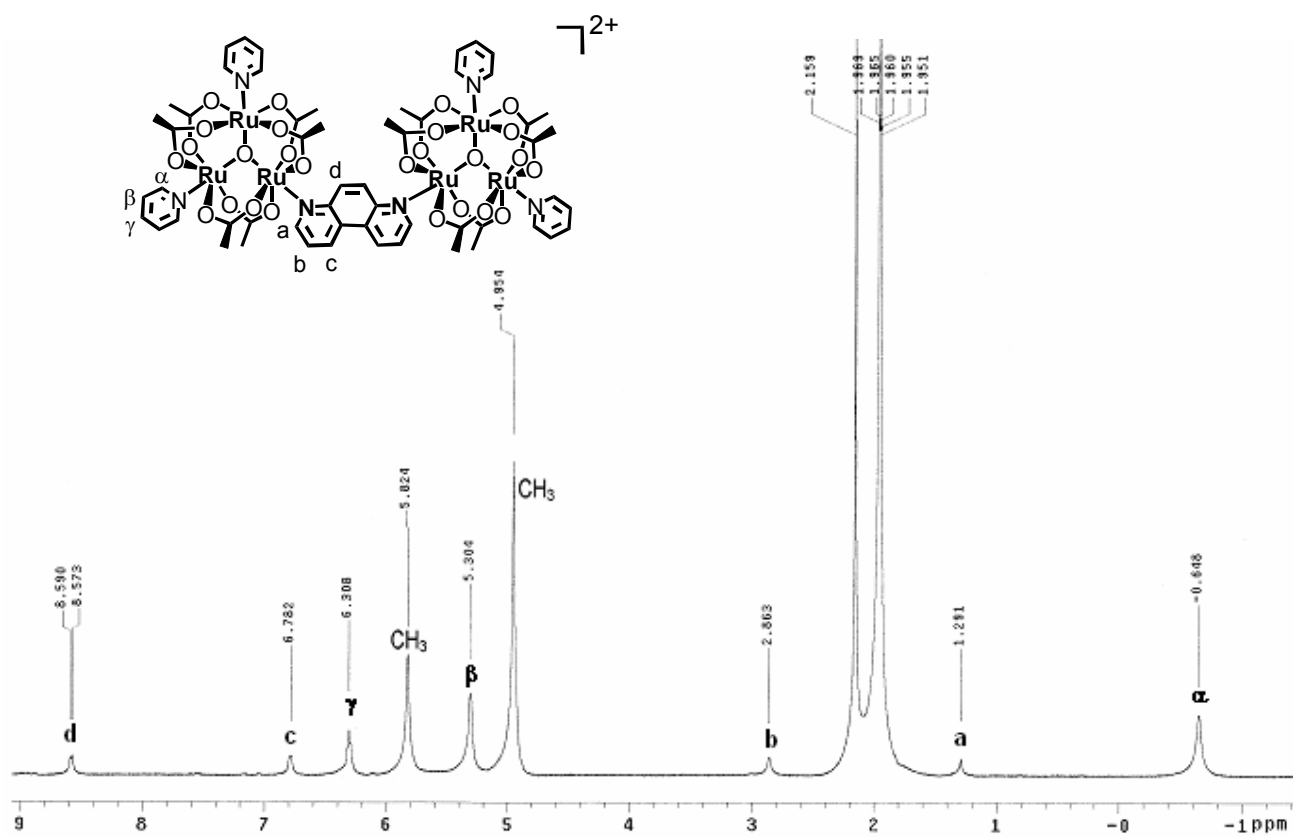

**Fig. S7.**  $^1\text{H}$  NMR (499.8 MHz) spectrum of compound **11** in  $\text{CD}_3\text{CN}$ .

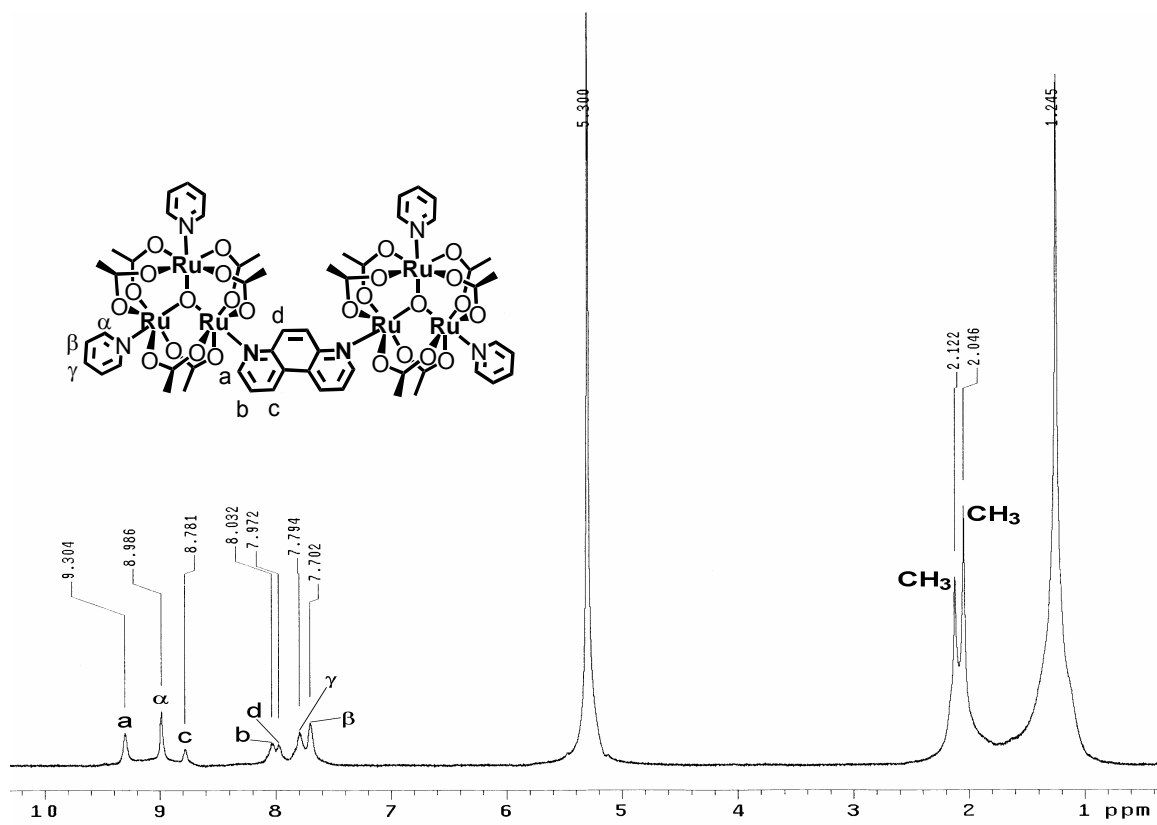

**Fig. S8.**  $^1\text{H}$  NMR (499.8 MHz) spectrum of compound **11a** in  $\text{CD}_2\text{Cl}_2$ .

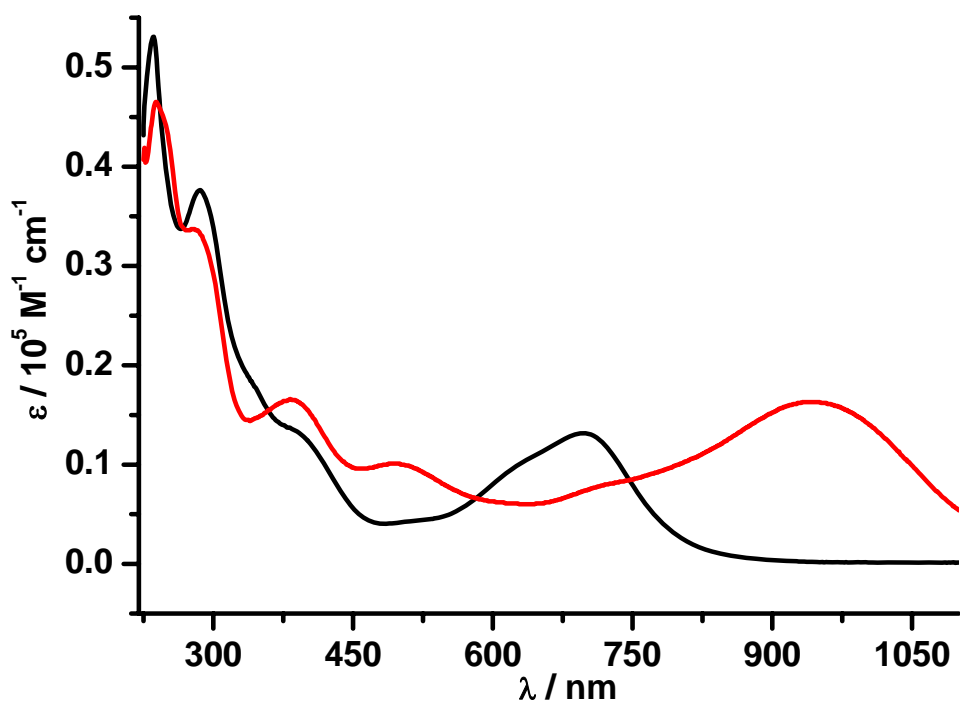

**Fig. S9.** Electronic absorption spectra of 2+ dimeric compound **7** (black line) and neutral compound **7a** (red line) in dichloromethane.

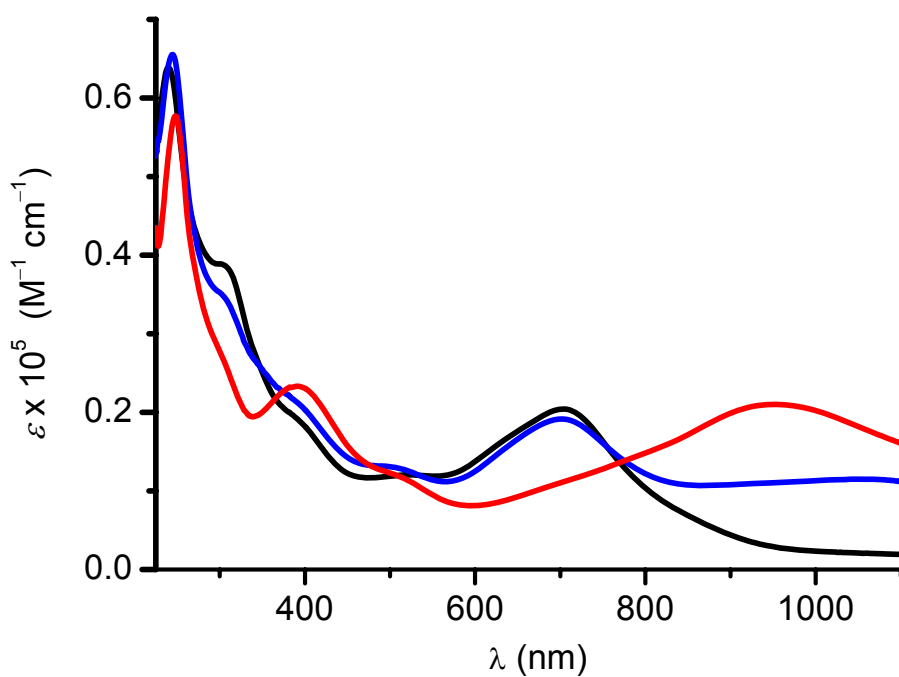

**Fig. 10.** Electronic absorption spectra of 3+ trimeric compound **8** (black line), neutral compound **8a** (red line) and 2+ compound **8b** (blue line) in dichloromethane.

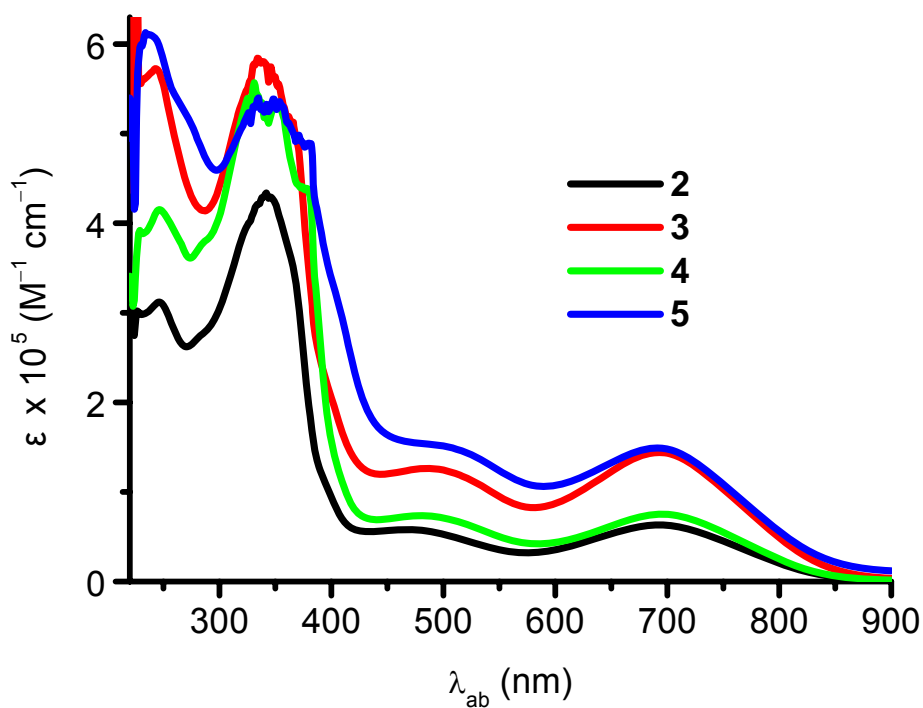

**Figure S11.** Electronic absorption spectra of compound 2(black), 3(red), 4(green), 5(blue) in dichloromethane.

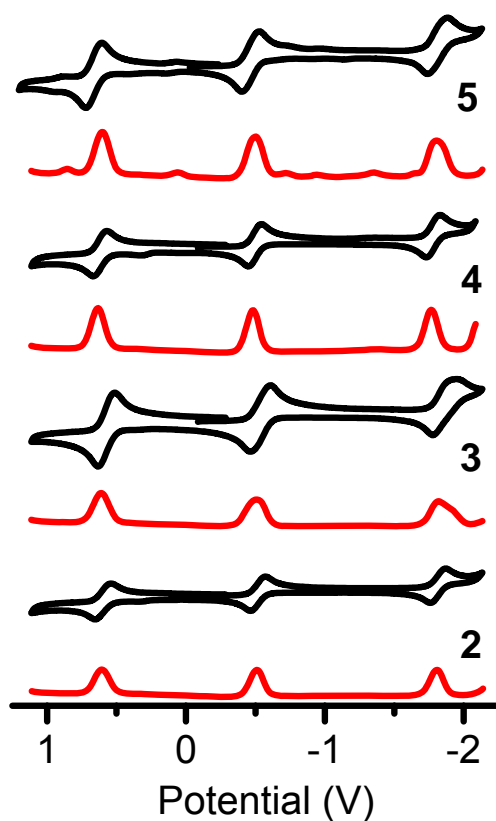

**Fig. S12** Plots of cyclic and differential pulse voltammograms for compound 2-5 in 0.1 M dichloromethane solution of  $(\text{Bu}_4\text{N})(\text{PF}_6)$ . The scan rates are 100 mV s<sup>-1</sup> for CV and 20 mV s<sup>-1</sup> for DPV.



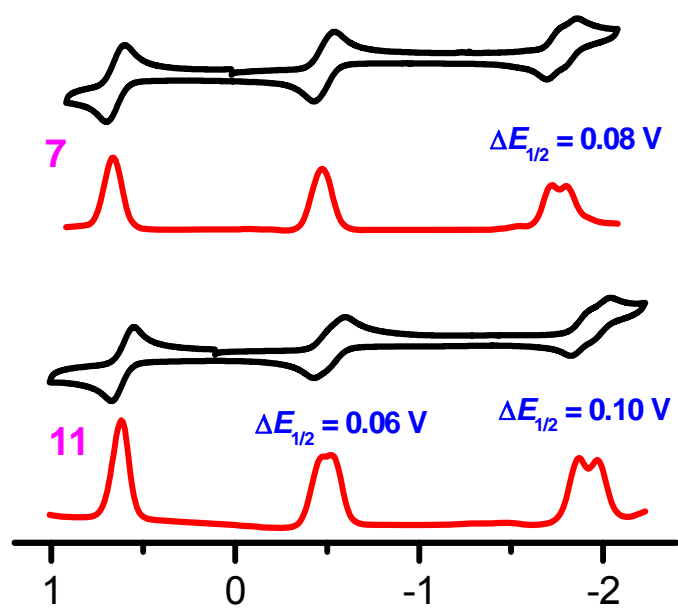

**Fig. S13.** Plots of cyclic and differential pulse voltammograms for bpz compound **7** and  $\mu$ -4,7-phen compound **11** in 0.1 M dichloromethane solution of  $(\text{Bu}_4\text{N})(\text{PF}_6)$ . The scan rates are  $100 \text{ mV s}^{-1}$  for CV and  $20 \text{ mV s}^{-1}$  for DPV.
